# Supplementary material
Source: MDPI journal article supplement (https://www.mdpi.com/2071-1050/12/2/479)
Supplement: s1 [file s1]

## ANNEX 1

### Acronyms

|      |                                                  |
|------|--------------------------------------------------|
| AVE  | Average variance extracted                       |
| HC   | Human capital                                    |
| HEIs | Higher education institutions                    |
| HTMT | Heterotrait-Monotrait                            |
| IC   | Intellectual capital                             |
| NUTS | Nomenclature of territorial units for statistics |
| PLS  | Partial least squares                            |
| QAL  | Quality of academic life                         |
| QoI  | Quality of life                                  |
| QWL  | Quality of work life                             |
| RC   | Relational capital                               |
| SC   | Structural capital                               |
| SD   | Sustainable development                          |
| SEM  | Structural equation model                        |
| SRMR | Standardized root mean square residual           |
| VIF  | Variance inflation factor                        |
| GDP  | Gross domestic product                           |

## ANNEX 2

**Table S1.** List of constructs and respective indicators referring to models 1 and 2

| <i>Constructs/ dimensions</i>              | <i>Indicators</i>                                                                                                                            | <i>Type</i> | <i>Acronym</i> |
|--------------------------------------------|----------------------------------------------------------------------------------------------------------------------------------------------|-------------|----------------|
| IC (2 <sup>nd</sup> order)                 | (HC + SC + RC)                                                                                                                               |             | IC             |
| Human capital (1 <sup>st</sup> order)      | 1. Percentage of expenditure on staff (teachers, researchers and administrative staff) in the university's total expenditure.                | R           | HC1            |
|                                            | 2. Leadership capacity.                                                                                                                      | R           | HC2            |
|                                            | 3. Average age of staff (teachers, researchers and administrative staff).                                                                    | R           | HC3            |
|                                            | 4. Weight of all teachers/researchers in relation to total number of students.                                                               | R           | HC4            |
|                                            | 5. Academic and professional qualifications of teachers/researchers.                                                                         | R           | HC5            |
|                                            | 6. Weight of all students in the 3rd and 2nd cycles in relation to total number of students.                                                 | R           | HC6            |
|                                            | 7. Total number of students.                                                                                                                 | R           | HC7            |
|                                            | 8. Number of new students admitted in the current academic year.                                                                             | R           | HC8            |
|                                            | 9. Number of student complaints.                                                                                                             | R           | HC9            |
|                                            | 10. Number of teachers with aggregation.                                                                                                     | R           | HC10           |
|                                            | 11. Number of participations in research projects.                                                                                           | R           | HC11           |
| Structural capital (1 <sup>st</sup> order) | 12. Weight of expenditure on information and communication technology in relation to total expenditure.                                      | R           | SC1            |
|                                            | 13. Weight of expenditure on scientific journals in relation to total expenditure on R&D.                                                    | R           | SC2            |
|                                            | 14. Weight of financing by third parties (public and private) for research and development (R&D) activities, in relation to total financing. | R           | SC3            |
|                                            | 15. Mission, vision, values and strategic and operational processes.                                                                         | R           | SC4            |
|                                            | 16. Management and organisation of teaching activities.                                                                                      | R           | SC5            |
|                                            | 17. Management and organisation of R&D activities.                                                                                           | R           | SC6            |
|                                            | 18. Total number of citations of teachers and researchers' publications.                                                                     | R           | SC7            |
|                                            | 19. Total number of publications (including co-authorship), by scientific area.                                                              | R           | SC8            |

|                                               |                                                                                                                                                                                                |   |      |
|-----------------------------------------------|------------------------------------------------------------------------------------------------------------------------------------------------------------------------------------------------|---|------|
| Relational capital<br>(1 <sup>st</sup> order) | 20. International public recognition, through the number of national/international awards received.                                                                                            | R | SC9  |
|                                               | 21. Total number of assessment, qualification, accreditation and certification processes.                                                                                                      | R | SC10 |
|                                               | 22. Total amount of infrastructure for research/incubation and laboratories is appropriate.                                                                                                    | R | SC11 |
|                                               | 23. Total number of contracts/cooperation agreements/protocols (teaching/research) with national and foreign public and private organisations.                                                 | R | RC1  |
|                                               | 24. Percentage of drop-out.                                                                                                                                                                    | R | RC2  |
|                                               | 25. Percentage of graduates (degree, master and Ph.D.).                                                                                                                                        | R | RC3  |
|                                               | 26. Ph.D. programmes with official recognition of quality.                                                                                                                                     | R | RC4  |
|                                               | 27. Image/opinion/reputation of the HEI (society, media, etc.) regionally, nationally and internationally.                                                                                     | R | RC5  |
|                                               | 28. Relations with society (N° of positions in organs of management/public governance/civic participation/consulting/accreditation/social or specialist consultancy forums and/or discussion). | R | RC6  |
|                                               | 29. Student satisfaction (with studies, services, infrastructure, etc.).                                                                                                                       | R | RC7  |
|                                               | 30. Number of foreign students (degree, master, Ph.D.) and in post-graduate programmes.                                                                                                        | R | RC8  |
|                                               | 31. Number of international speakers invited to learning programmes.                                                                                                                           | R | RC9  |
|                                               | 32. Number of countries with collaborations developed with the HEI.                                                                                                                            | R | RC10 |
| Sustainable development practices (2nd order) | (Economic + environmental + social + organizational)                                                                                                                                           |   | SD   |
| Economic (1st order)                          | Positive evolution in the financial situation.                                                                                                                                                 | R | ECO1 |
|                                               | Increased scientific productivity and economic valorisation of research results.                                                                                                               | R | ECO2 |
|                                               | Reinforced pro-efficiency orientation, reducing operational costs.                                                                                                                             | R | ECO3 |
| Environmental (1st order)                     | Reinforced pro-sustainability orientation, reducing the environmental impact arising from activities.                                                                                          |   | ENV  |
| Social (1st order)                            | Demonstration of social impact and openness to society.                                                                                                                                        | R | SOC  |
| Organizational (1st order)                    | High levels of student satisfaction.                                                                                                                                                           | R | ORG1 |
|                                               | Providing students with value through activities.                                                                                                                                              | R | ORG2 |

|                             |                                                                                                                                                                                                                                                                                                                                                                 |   |       |
|-----------------------------|-----------------------------------------------------------------------------------------------------------------------------------------------------------------------------------------------------------------------------------------------------------------------------------------------------------------------------------------------------------------|---|-------|
| QAL (1 <sup>st</sup> order) | Ability to retain and attract new students.                                                                                                                                                                                                                                                                                                                     | R | ORG3  |
|                             | Attaining the desired levels of growth.                                                                                                                                                                                                                                                                                                                         | R | ORG4  |
|                             | Cognitive component – Satisfaction with: health and safety; family and economy; socialization; self-esteem; updating; knowledge; aesthetics.                                                                                                                                                                                                                    | R | QALCC |
|                             | Affective component (positive emotions less negative ones)<br>Positive emotions include feeling: enthusiastic; interested; determined; lively; inspired; alert; active; strong; proud; and affectionate.<br>Negative emotions include feeling: afraid; bored; anxious; nervous; ashamed; guilty; irritated; and aggressive.                                     | R | QALCA |
| QWL (1 <sup>st</sup> order) | Lower order needs – Need for satisfaction with health and safety: physical safety, health benefits, health; Need for satisfaction with economy and family: remuneration, security, work/family relationship; Need for satisfaction with socialization: relations at work, free time.                                                                            | R | QWLLO |
|                             | Higher order needs – Need for satisfaction with esteem: esteem, respectability; Need for satisfaction with updating: perceived potential at work, perceived potential as a specialist. Need for satisfaction with knowledge: continuous learning, Professional competences; Need for satisfaction with aesthetics: creativity at work, creativity outside work. | R | QWLHO |

Legend: R=Reflexive.

Source: Own elaboration.

Distribution of respondent students and teachers/researchers by HEI, area of study, gender and age-group

| Area of study/Work (Code*)                                                                 | HEIs  |      |     |     |      |      |      |      |      |      |     |     |      |      | Absolute frequency |     | Weight (%) |       |
|--------------------------------------------------------------------------------------------|-------|------|-----|-----|------|------|------|------|------|------|-----|-----|------|------|--------------------|-----|------------|-------|
|                                                                                            | ISCTE |      | UAC |     | UAL  |      | UM   |      | UE   |      | UMA |     | UM   |      |                    |     |            |       |
|                                                                                            | S     | T/R  | S   | T/R | S    | T/R  | S    | T/R  | S    | T/R  | S   | T/R | S    | T/R  | S                  | T/R | S          | T/R   |
| Agriculture (6) and Services (8)                                                           | 0     | 0    | 0   | 10  | 0    | 0    | 0    | 0    | 0    | 2    | 0   | 0   | 0    | 0    | 0                  | 12  | 0          | 2.0   |
| Arts and Humanities (2)                                                                    | 0     | 0    | 1   | 0   | 3    | 0    | 5    | 12   | 0    | 0    | 7   | 8   | 14   | 0    | 30                 | 20  | 4,1        | 3.4   |
| Social Sciences, Trade and Law (3)                                                         | 1     | 71   | 0   | 12  | 0    | 28   | 0    | 28   | 0    | 36   | 0   | 13  | 0    | 75   | 364                | 263 | 49.3       | 44.8  |
| Science, Mathematics and Computers (4)                                                     | 83    | 0    | 9   | 11  | 66   | 19   | 93   | 22   | 81   | 22   | 7   | 9   | 24   | 16   | 48                 | 99  | 6,5        | 16,9  |
| Sciences, Mathematics and Informatics (4), Engineering, Manufacturing and construction (5) | 1     | 0    | 12  | 0   | 6    | 0    | 4    | 0    | 0    | 17   | 5   | 8   | 20   | 0    | 0                  | 25  | 0          | 4.3   |
| Education (1)                                                                              | 0     | 0    | 1   | 0   | 0    | 5    | 0    | 0    | 6    | 0    | 5   | 0   | 16   | 14   | 28                 | 19  | 3.8        | 3.2   |
| Engineering, Manufacturing and construction (5)                                            | 22    | 0    | 1   | 0   | 10   | 3    | 8    | 20   | 1    | 0    | 9   | 0   | 144  | 51   | 195                | 73  | 26.4       | 12.6  |
| Health and Social Protection (7)                                                           | 0     | 0    | 24  | 3   | 13   | 7    | 21   | 20   | 0    | 5    | 2   | 3   | 1    | 20   | 61                 | 57  | 8.3        | 9.9   |
| They did not answer                                                                        | 11    | 6    | 0   | 3   | 0    | 2    | 1    | 3    | 0    | 0    | 0   | 0   | 0    | 3    | 12                 | 17  | 1.6        | 2,9   |
| Study Cycle                                                                                |       |      |     |     |      |      |      |      |      |      |     |     |      |      |                    |     |            |       |
| Graduation                                                                                 | 79    | -    | 35  | -   | 86   | -    | 29   | -    | 88   | -    | 21  | -   | 143  | -    | 481                | -   | 65.2       | -     |
| Master                                                                                     | 39    | -    | 10  | -   | 8    | -    | 55   | -    | 0    | -    | 8   | -   | 44   | -    | 164                | -   | 22.2       | -     |
| PhD                                                                                        | 0     | -    | 3   | -   | 0    | -    | 30   | -    | 0    | -    | 5   | -   | 4    | -    | 42                 | -   | 5.7        | -     |
| Integrated Master                                                                          | 0     | -    | 0   | -   | 4    | -    | 18   | -    | 0    | -    | 1   | -   | 28   | -    | 51                 | -   | 6.9        | -     |
| Gender                                                                                     |       |      |     |     |      |      |      |      |      |      |     |     |      |      |                    |     |            |       |
| Female                                                                                     | 76    | 43   | 32  | 18  | 60   | 36   | 77   | 48   | 56   | 34   | 20  | 22  | 131  | 110  | 452                | 311 | 61.2       | 53.0  |
| Male                                                                                       | 42    | 34   | 16  | 21  | 38   | 28   | 55   | 57   | 32   | 48   | 15  | 19  | 88   | 69   | 286                | 276 | 38.8       | 47.0  |
| Age Group                                                                                  |       |      |     |     |      |      |      |      |      |      |     |     |      |      |                    |     |            |       |
| 18-25                                                                                      | 114   | 0    | 35  | 0   | 82   | 0    | 74   | 0    | 88   | 0    | 21  | 1   | 214  | 0    | 628                | 1   | 85.1       | 0.2   |
| 26-35                                                                                      | 4     | 2    | 9   | 0   | 10   | 4    | 20   | 5    | 0    | 1    | 6   | 2   | 3    | 27   | 52                 | 41  | 7.0        | 7.0   |
| 36-45                                                                                      | 0     | 36   | 3   | 2   | 5    | 13   | 16   | 36   | 0    | 13   | 1   | 12  | 0    | 45   | 25                 | 157 | 3.4        | 26.7  |
| 46-55                                                                                      | 0     | 26   | 1   | 18  | 0    | 25   | 17   | 43   | 0    | 36   | 4   | 15  | 0    | 83   | 22                 | 246 | 3.0        | 41.9  |
| > 55                                                                                       | 0     | 13   | 0   | 19  | 1    | 22   | 5    | 21   | 0    | 32   | 3   | 11  | 2    | 24   | 11                 | 142 | 1.5        | 24.2  |
| Absolute frequency                                                                         | 118   | 77   | 48  | 39  | 98   | 64   | 132  | 105  | 88   | 82   | 35  | 41  | 219  | 179  | 738                | 587 |            |       |
| HEIs weight (%)                                                                            | 16.0  | 13.1 | 6.5 | 6,6 | 13.3 | 10.9 | 17.9 | 17.9 | 11,9 | 14.0 | 4.7 | 7.0 | 29.7 | 30.5 |                    |     | 100.0      | 100.0 |

Legend: S=Students; T/R=Teachers/researchers.

\* Code according to CNAEF - National Classification of Areas of Education and Training.

Source: Own elaboration.
